# Supplementary material
Source: PubMed Central journal article supplement (PMC4407130)
Supplement: ptc-67-184-Appendix.pdf [file ptc-67-184-Appendix.pdf]

## APPENDIX 1

**Table A1** Functional Assessments of Mobility and Balance Used in the Study

| Study outcomes | Brief description                                                            | Valid and reliable | Cutoff score                                                                                                 |
|----------------|------------------------------------------------------------------------------|--------------------|--------------------------------------------------------------------------------------------------------------|
| CB&M           | 13 tasks assessing higher-level balance and mobility <sup>1</sup>            | Yes <sup>2</sup>   | Score $\leq 45$ has high sensitivity to discriminate recurrent fallers from non-fallers <sup>2</sup>         |
| ABC            | 16-item self-report questionnaire                                            | Yes <sup>3</sup>   | Score $< 67\%$ predicts fall risk <sup>4</sup>                                                               |
| DGI            | 8 gait tasks assessing ability to adapt to gait challenges                   | Yes <sup>5</sup>   | Score $< 19$ indicates increased falls risk <sup>6</sup>                                                     |
| BBS            | 14 tasks assessing balance                                                   | Yes <sup>7</sup>   | Score $< 36$ suggests 100% fall risk; score $< 45$ predicts fall risk <sup>8</sup>                           |
| SPPB           | 3 components assessing standing balance, gait speed, and repeated chair rise | Yes <sup>9</sup>   | Score $\leq 10$ predicts future mobility disability <sup>10</sup>                                            |
| TUG            | Measures functional mobility                                                 | Yes <sup>11</sup>  | Score $> 14$ seconds has high sensitivity and specificity in predicting fallers and non-fallers <sup>6</sup> |
| FRT            | Quick screen for balance problems                                            | Yes <sup>12</sup>  | Score $< 7$ in. [17.8 cm] predicts independent community ambulation <sup>12</sup>                            |

CB&M = Community Balance and Mobility scale; ABC = Activities-specific Balance Confidence scale; DGI = Dynamic Gait Index; BBS = Berg Balance Scale; SPPB = Short Physical Performance Battery; TUG = timed up-and-go test; FRT = Functional Reach Test.

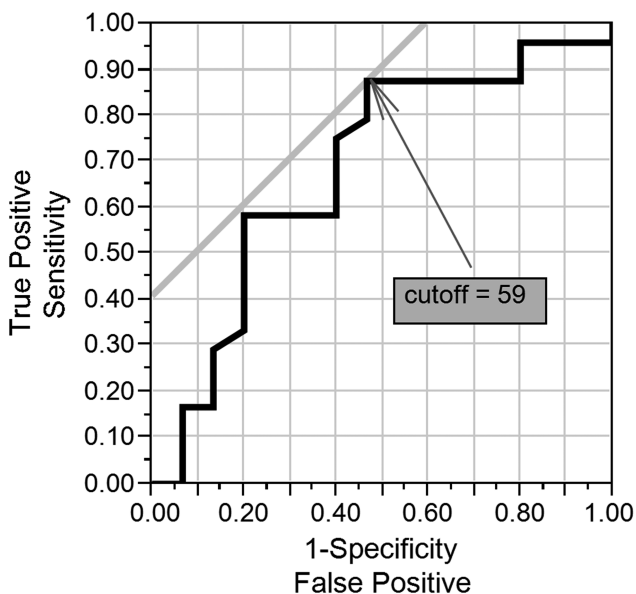

**Figure A1** ROC curve for assessing the likelihood of one or more falls<sup>12</sup> using the CB&M as the predictor.

ROC = receiver operating characteristic; CB&M = Community Balance and Mobility scale.

## REFERENCES

- Howe JA, Inness EL, Venturini A, et al. The Community Balance and Mobility Scale—a balance measure for individuals with traumatic brain injury. *Clin Rehabil.* 2006;20(10):885–95. Medline:17008340
- Balasubramanian CK. The Community Balance and Mobility Scale alleviates the ceiling effects observed in the currently used gait and balance assessments for the community-dwelling older adults. *J Geriatr Phys Ther.* [Epub 2014 Jun 19] <http://dx.doi.org/10.1519/JPT.000000000000024>. Medline:24949849

- Powell LE, Myers AM. The Activities-specific Balance Confidence (ABC) Scale. *J Gerontol A Biol Sci Med Sci.* 1995;50A(1):M28–34. <http://dx.doi.org/10.1093/gerona/50A.1.M28>. Medline:7814786
- Lajoie Y, Gallagher SP. Predicting falls within the elderly community: comparison of postural sway, reaction time, the Berg Balance Scale and the Activities-specific Balance Confidence (ABC) scale for comparing fallers and non-fallers. *Arch Gerontol Geriatr.* 2004;38(1):11–26. [http://dx.doi.org/10.1016/S0167-4943\(03\)00082-7](http://dx.doi.org/10.1016/S0167-4943(03)00082-7). Medline:14599700
- Shumway-Cook A, Baldwin M, Polissar NL, et al. Predicting the probability for falls in community-dwelling older adults. *Phys Ther.* 1997;77(8):812–9. Medline:9256869
- Shumway-Cook A, Brauer S, Woollacott M. Predicting the probability for falls in community-dwelling older adults using the Timed Up & Go Test. *Phys Ther.* 2000;80(9):896–903. Medline:10960937
- Berg K, Wood-Dauphinee S, Williams JL. The Balance Scale: reliability assessment with elderly residents and patients with an acute stroke. *Scand J Rehabil Med.* 1995;27(1):27–36. Medline:7792547
- Muir SW, Berg K, Chesworth B, et al. Use of the Berg Balance Scale for predicting multiple falls in community-dwelling elderly people: a prospective study. *Phys Ther.* 2008;88(4):449–59. <http://dx.doi.org/10.2522/ptj.20070251>. Medline:18218822
- Guralnik JM, Simonsick EM, Ferrucci L, et al. A short physical performance battery assessing lower extremity function: association with self-reported disability and prediction of mortality and nursing home admission. *J Gerontol.* 1994;49(2):M85–94. <http://dx.doi.org/10.1093/geronj/49.2.M85>. Medline:8126356
- Rikli R, Jones CJ. *Senior Fitness Test manual.* Champaign, IL: Human Kinetics; 2001.
- Podsiadlo D, Richardson S. The timed “up & go”: a test of basic functional mobility for frail elderly persons. *J Am Geriatr Soc.* 1991;39(2):142–8. Medline:1991946
- Duncan PW, Studenski S, Chandler J, et al. Functional reach: predictive validity in a sample of elderly male veterans. *J Gerontol.* 1992;47(3):M93–8. <http://dx.doi.org/10.1093/geronj/47.3.M93>. Medline:1573190

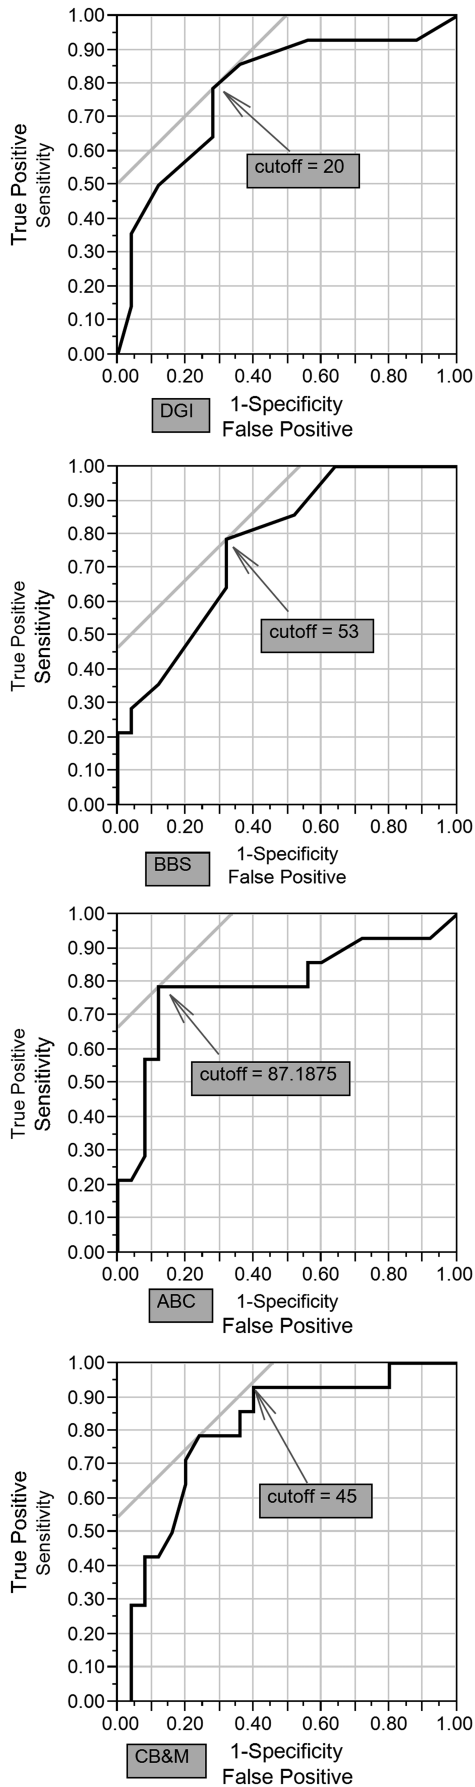

**Figure A2** ROC curves for assessing the likelihood of two or more falls using the CB&M, ABC, BBS, and DGI as the predictors. CB&M = Community Balance and Mobility scale; ABC = Activities-specific Balance Confidence scale; BBS = Berg Balance Scale; DGI = Dynamic Gait Index.
